# Supplementary material for: Novel Role of Endogenous Catalase in Macrophage Polarization in Adipose Tissue
Source: Hindawi journal article supplement (doi:10.1155/2016/8675905), 2016-01-01
Supplement: f1 [file 8675905.f1.pdf]

**Catalase**

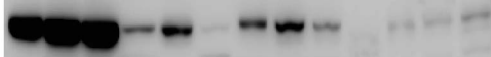

**Liver**

**Kidney Cortex**

**Kidney Medulla**

**Heart**

**Lung**

**BAT**

**Epi WAT**

**Sub WAT**

**Om WAT**

**Pancreas**

**Spleen**

**Testis**

**Thyroid**

**Supplementary fig. 1**
